# Supplementary material for: Latent Class Analysis Identifies Distinct Phenotypes of Systemic Lupus Erythematosus Predictive of Flares after mRNA COVID-19 Vaccination: Results from the Coronavirus National Vaccine Registry for ImmuNe Diseases SINGapore (CONVIN-SING)
Source: MDPI journal article supplement (doi:10.3390/vaccines12010029), 2023-12-27
Supplement: s1 [file s1]

## **SUPPLEMENTARY INFORMATION**

### **Latent Class Analysis Identifies Distinct Phenotypes of Systemic Lupus Erythematosus Predictive of Flares After mRNA COVID-19 Vaccination: Results from the COronavirus National Vaccine registry for ImmuNe diseases SINGapore (CONVIN-SING)**

Tao Ming Sim, Manjari Lahiri, Margaret Ma, Peter Pak-Moon Cheung, Anselm Mak, Warren Fong, Stanley Angkodjojo, Chuanhui Xu, Kok Ooi Kong, Thaschawee Arkachaisri, Kee Fong Phang, Teck Choon Tan, Qai Ven Yap, Yiong Huak Chan, Melonie Sriranganathan, Tyng Yu Chuah, Nur Emillia Roslan, Yih Jia Poh, Annie Law, Amelia Santosa and Sen Hee Tay

**Supplementary Table S1.** Latent Class Analysis model fit (Bayesian information criterion) for test, validation and combined clusters.

| Class | Test Cohort | Validation Cohort | Combined Cohort |
|-------|-------------|-------------------|-----------------|
| 2     | 5348.407    | 6230.895          | 11577.99        |
| 3     | 5396.743    | 6274.162          | 11649.08        |
| 4     | 5396.517    | 6267.334          | 11624.43        |
| 5     | 5455.038    | 6372.67           | 11728.93        |

**Supplementary Table S2.** Proportion of patients who flared within 3 weeks of the first dose of mRNA COVID-19 vaccination versus within 3 weeks of the second dose.

| Cohort     | Flare after dose 1 | Flare after dose 2 | P value |
|------------|--------------------|--------------------|---------|
| Test       | 5/301 (1.7%)       | 4/296 (1.4%)       | 0.756   |
| Validation | 11/328 (3.4%)      | 11/317 (3.5%)      | 0.935   |
| Combined   | 16/629 (2.5%)      | 15/613 (2.4%)      | 0.913   |

**Supplementary Table S3.** Studies on SLE flares after mRNA COVID-19 vaccination.

| Patients                                                                                                                    | Number                       | Ethnicity                                                            | Design                     | COVID-19 mRNA Vaccine | Results                                                                                                                                                              | Notes                                                                                                                                                                              | Ref |
|-----------------------------------------------------------------------------------------------------------------------------|------------------------------|----------------------------------------------------------------------|----------------------------|-----------------------|----------------------------------------------------------------------------------------------------------------------------------------------------------------------|------------------------------------------------------------------------------------------------------------------------------------------------------------------------------------|-----|
| Outpatient SLE from a rheumatology division in New York                                                                     | SLE: 183                     | White: 65.6%<br><br>Hispanic: 15.9%<br><br>Others: 18.5%             | Cross-sectional study      | Pfizer and Moderna    | 11 (6%) patients reported flares, mostly mild-moderate in severity                                                                                                   | Common manifestations of flare include joint pain, skin rash, fatigue, muscle aches and mouth ulcers                                                                               | 25  |
| SLE patients who had received COVID-19 vaccination                                                                          | SLE: 452                     | Italian majority                                                     | Retrospective cohort study | Pfizer and Moderna    | 19 (4%) patients experienced flares, none required hospitalization                                                                                                   | Musculoskeletal, constitutional symptoms and renal were the most common type of flare                                                                                              | 26  |
| Patients with rheumatic and musculoskeletal diseases who had received two doses of COVID-19 mRNA vaccination                | SLE: 273<br><br>Total: 1,377 | White: 90%<br><br>Non-white: 10%                                     | Prospective cohort study   | Pfizer and Moderna    | 30 (11%) SLE patients experienced flares, none required hospital or intensive care unit admission                                                                    | Common manifestations of flare include joint pain, fatigue, keratoconjunctivitis sicca and musculoskeletal pain                                                                    | 27  |
| Patients with systemic rheumatic diseases who had received COVID-19 vaccination                                             | SLE: 391<br><br>Total: 2,860 | Overall cohort:<br><br>White: 86.3%<br><br>Non-white: 13.7%          | Cross-sectional study      | Pfizer and Moderna    | Flare of any rheumatic disease was as high as 13.1%, but significant flares requiring changes to medication were relatively uncommon (4.2%)                          | While rates of flares of rheumatic disease and systemic reactions to mRNA COVID-19 vaccination were reported, flares severe enough to warrant a change in medication were uncommon | 28  |
| Patients with inflammatory and non-inflammatory rheumatic and musculoskeletal disease who had received COVID-19 vaccination | SLE: 367<br><br>Total: 5,121 | White majority, multinational cohort from various European countries | Retrospective cohort study | Pfizer and Moderna    | About 5% of patients with inflammatory rheumatic musculoskeletal disease flared following vaccination, 1.7% were mild/minor, 2.6% were moderate and 0.5% were severe | Common manifestations of flare include polyarthralgia, arthritis flare and fatigue<br><br>Overall, mRNA COVID-19 vaccination was largely well-tolerated                            | 29  |

|  |  |  |  |  |                                                                                |  |  |
|--|--|--|--|--|--------------------------------------------------------------------------------|--|--|
|  |  |  |  |  | 37% of patients experienced vaccine-related adverse effects, mostly non-severe |  |  |
|--|--|--|--|--|--------------------------------------------------------------------------------|--|--|
